# Supplementary material for: A numerical model for water hydration on nanosurfaces: from friction to hydrophilicity and hydrophobicity
Source: Royal Society of Chemistry journal article supplement (doi:10.1039/d3cp01485a), 2023-01-01
Supplement: d3cp01485a1.pdf [file d3cp01485a1.pdf]

## Electronic Supplementary Information

# **A Numerical Model for Water Hydration on Nanosurface: From Friction to Hydrophilicity and Hydrophobicity**

Shuwen Zhang, Zhihao Wang, Chao Ding, Hongwang Lu\*, Yuanyuan Qu, Yong-Qiang Li, Mingwen

Zhao and Weifeng Li\*

School of Physics, Shandong University, Jinan, Shandong 250100, China

Corresponding author: lu@sdu.edu.cn (H. Lu) and lwf@sdu.edu.cn (W. Li)

**Table S1.** The forcefield parameters of five native nanostructures.

|                         | $\epsilon$ (kJ/mol) | $\sigma$ (nm) | Charge (e) |
|-------------------------|---------------------|---------------|------------|
| C(GRA) [1]              | 0.360               | 0.340         | 0          |
| C(C <sub>3</sub> N) [2] | 0.360               | 0.340         | 0.056      |
| N(C <sub>3</sub> N)     | 0.711               | 0.325         | -0.168     |
| C(C <sub>2</sub> N) [3] | 0.360               | 0.340         | 0.24       |
| N(C <sub>2</sub> N)     | 0.711               | 0.325         | -0.48      |
| B(BC <sub>3</sub> ) [2] | 0.399               | 0.345         | 0.378      |
| C(BC <sub>3</sub> )     | 0.360               | 0.340         | -0.126     |
| B(h-BN) [4]             | 0.399               | 0.345         | 0.37       |
| N(h-BN)                 | 0.711               | 0.325         | -0.37      |

**Table S2.** Friction coefficient and the maximum corrugation of the free energy  $\Delta G_{\text{max-min}}$  of the simulated models.

| Model                 | Friction coefficient<br>( $\times 10^5 \text{ N s/m}^3$ ) | $\Delta G_{\text{max-min}}$ (kJ/mol) |
|-----------------------|-----------------------------------------------------------|--------------------------------------|
| GRA                   | $0.14 \pm 0.01$                                           | $0.59 \pm 0.006$                     |
| C <sub>3</sub> N- 0   | $0.16 \pm 0.01$                                           | $0.60 \pm 0.006$                     |
| BC <sub>3</sub> - 0   | $0.26 \pm 0.02$                                           | $0.97 \pm 0.009$                     |
| h-BN- 0               | $0.30 \pm 0.01$                                           | $0.86 \pm 0.008$                     |
| h-BN                  | $0.35 \pm 0.01$                                           | $0.88 \pm 0.010$                     |
| C <sub>3</sub> N      | $0.47 \pm 0.03$                                           | $0.72 \pm 0.009$                     |
| C <sub>3</sub> N- 1.1 | $0.50 \pm 0.01$                                           | $0.75 \pm 0.009$                     |
| C <sub>3</sub> N- 1.2 | $0.57 \pm 0.06$                                           | $0.81 \pm 0.009$                     |
| C <sub>3</sub> N- 1.3 | $0.65 \pm 0.05$                                           | $0.822 \pm 0.009$                    |
| C <sub>3</sub> N- 1.4 | $0.72 \pm 0.03$                                           | $0.845 \pm 0.009$                    |
| C <sub>3</sub> N- 1.5 | $0.79 \pm 0.06$                                           | $0.877 \pm 0.009$                    |
| C <sub>2</sub> N- 0   | $2.61 \pm 0.24$                                           | $4.23 \pm 0.039$                     |
| BC <sub>3</sub>       | $3.36 \pm 0.18$                                           | $2.78 \pm 0.019$                     |
| BC <sub>3</sub> - 1.1 | $4.44 \pm 0.46$                                           | $3.23 \pm 0.022$                     |
| BC <sub>3</sub> - 1.2 | $5.29 \pm 0.20$                                           | $3.77 \pm 0.025$                     |
| BC <sub>3</sub> - 1.3 | $5.95 \pm 0.24$                                           | $4.31 \pm 0.028$                     |
| BC <sub>3</sub> - 1.4 | $6.74 \pm 0.47$                                           | $4.92 \pm 0.030$                     |
| BC <sub>3</sub> - 1.5 | $7.72 \pm 0.53$                                           | $5.50 \pm 0.032$                     |
| C <sub>2</sub> N      | $9.88 \pm 0.20$                                           | $10.16 \pm 0.082$                    |
| C <sub>2</sub> N- 1.1 | $11.50 \pm 0.07$                                          | $10.79 \pm 0.082$                    |
| C <sub>2</sub> N- 1.2 | $13.06 \pm 0.12$                                          | $11.51 \pm 0.082$                    |
| C <sub>2</sub> N- 1.3 | $14.39 \pm 0.11$                                          | $12.47 \pm 0.081$                    |
| C <sub>2</sub> N- 1.4 | $15.89 \pm 0.27$                                          | $13.29 \pm 0.080$                    |
| C <sub>2</sub> N- 1.5 | $17.39 \pm 0.32$                                          | $14.03 \pm 0.078$                    |

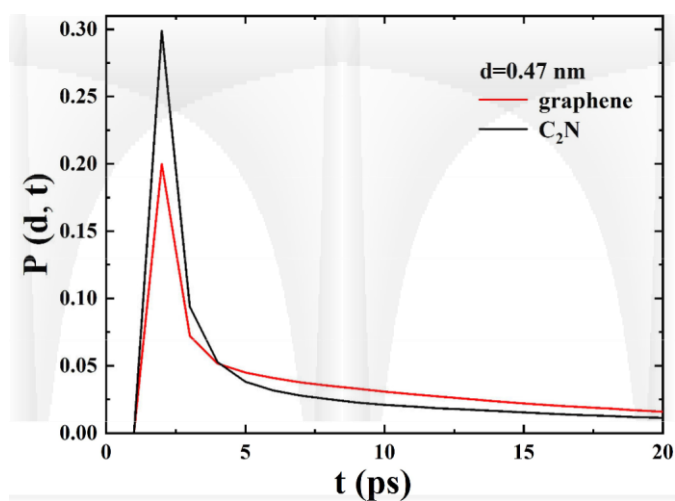

**Fig. S1** The  $P(d, t)$  ( $d = 0.47$  nm) profiles with respect to  $t$  for GRA and  $C_2N$ , respectively.

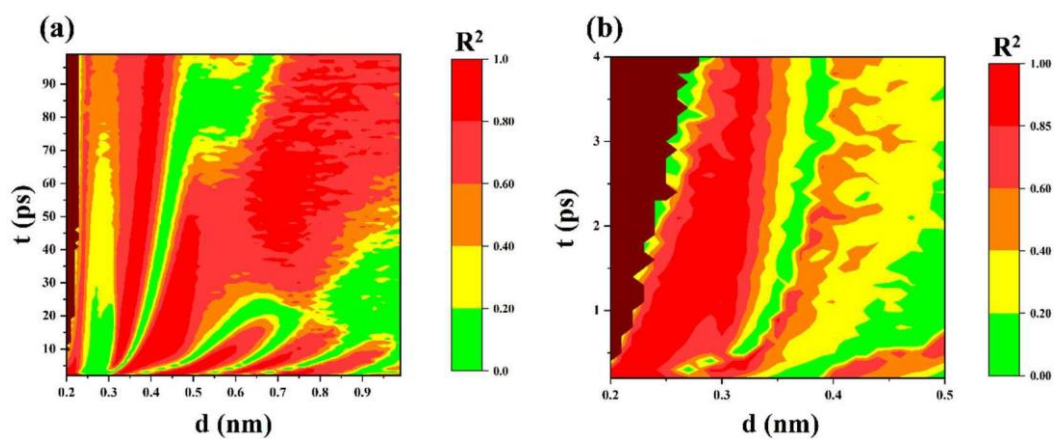

**Fig. S2** Coefficient of determination ( $R^2$ ) between  $\square$  and  $P(d, t)$  for (a) all the models and (b) 11 models with low friction coefficients.

## 1. The position-restrained MD simulation

In the real conditions, water molecules interact with the atoms of nanomaterials and may force them to leave their original positions. Thus, the nanomaterials maybe not flat. To test how these structure changes affects the main results, we added simulations where position-restrains were added to the atoms of nanostructures instead of freezing them in the main discussions. The position restraint parameter is set to be  $k = 50 \text{ kJ/mol/rad}^2$ . We did not consider fully relaxed nanostructures because in the experiments, the nanomaterials are usually placed on substrate (like Si and Cu) which can maintain a flat surface. The comparison of the friction coefficients for position-frozen and position-restrained MD simulations are summarized in Table S3 and Fig. S3 shown below. It is clear that the movements of the atoms only have a very small effect on the friction coefficients. Therefore, we believe that the results in the main manuscript are reasonable.

**Table S3.** The comparison of friction coefficients between the position-frozen and position-restrained MD simulations for five native 2D nanostructures.

| Model            | Friction coefficient ( $\times 10^5 \text{ N s/m}^3$ ) |                     |
|------------------|--------------------------------------------------------|---------------------|
|                  | position frozen                                        | position restrained |
| GRA              | $0.14 \pm 0.01$                                        | $0.18 \pm 0.01$     |
| h-BN             | $0.35 \pm 0.01$                                        | $0.28 \pm 0.03$     |
| C <sub>3</sub> N | $0.47 \pm 0.03$                                        | $0.47 \pm 0.03$     |
| BC <sub>3</sub>  | $3.36 \pm 0.18$                                        | $3.53 \pm 0.23$     |
| C <sub>2</sub> N | $9.88 \pm 0.20$                                        | $10.20 \pm 0.24$    |

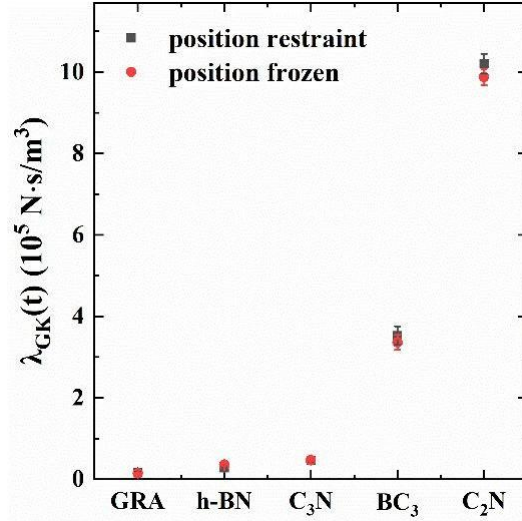

**Fig. S3** The comparison of friction coefficients between the position-frozen and position-restrained MD simulations for five native 2D nanostructures.

## 2. Five more models to estimate the borderline between hydrophobic and hydrophilic surface

In the main manuscript, initially we have used 24 models. From Fig. 3(c)-3(e), the borderline between hydrophobic and hydrophilic surface is between  $(0.79 \pm 0.06) \times 10^5 \text{ N s/m}^3$  (C<sub>3</sub>N-1.5) and  $(2.61 \pm 0.24) \times 10^5 \text{ N s/m}^3$  (C<sub>2</sub>N- 0). To enhance the accuracy, we added five more models, say C<sub>3</sub>N-1.6, C<sub>3</sub>N-1.7, C<sub>3</sub>N-1.8, C<sub>3</sub>N-1.9 and C<sub>3</sub>N-2.0, where the  $\lambda$  is summarized in Table S4. The dependence of  $\lambda$  with  $P(d, t)$  are shown in Fig. S4, from which it is clear that these five more models are classified as hydrophobic. Summarizing all the results, the borderline is between  $(1.35 \pm 0.08) \times 10^5 \text{ N s/m}^3$  (C<sub>3</sub>N-2.0) and  $(2.61 \pm 0.24) \times 10^5 \text{ N s/m}^3$  (C<sub>2</sub>N- 0), which is estimated to be  $2 \times 10^5 \text{ N s/m}^3$ .

**Table S4.** Friction coefficients of five more models.

| Model                | Friction coefficient ( $\times 10^5 \text{ N s/m}^3$ ) |
|----------------------|--------------------------------------------------------|
| C <sub>3</sub> N-1.6 | $0.91 \pm 0.04$                                        |
| C <sub>3</sub> N-1.7 | $0.97 \pm 0.02$                                        |
| C <sub>3</sub> N-1.8 | $1.06 \pm 0.05$                                        |
| C <sub>3</sub> N-1.9 | $1.18 \pm 0.05$                                        |
| C <sub>3</sub> N-2.0 | $1.35 \pm 0.08$                                        |

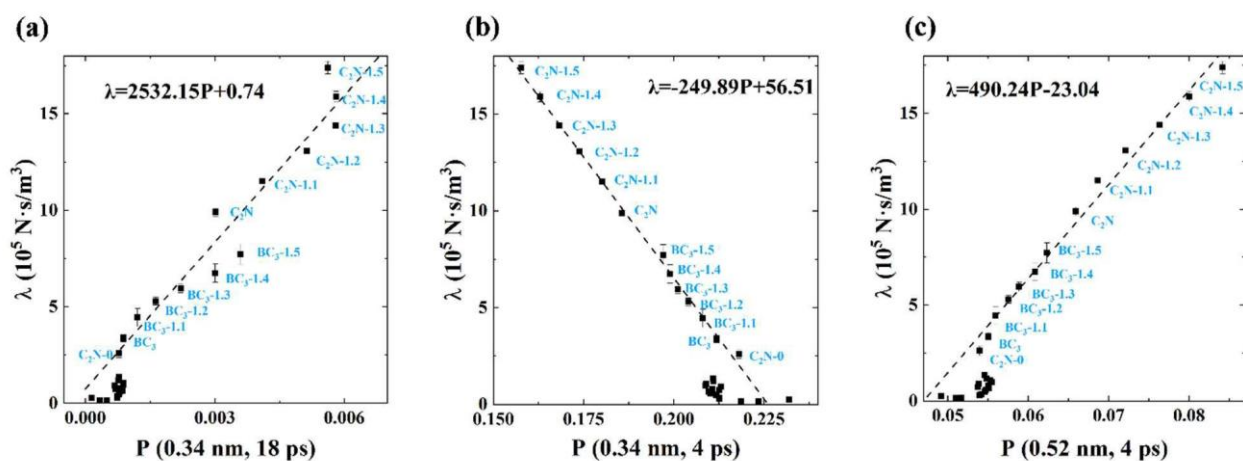

**Fig. S4** The relationships between  $\lambda$  and  $P(d, t)$  at point c, d and e in Fig. 3(a) of main manuscript for all the 29 systems, respectively. It is clear that the five more models are classified as hydrophobic surfaces.

## Reference

1. Z. Yang, C. Ge, J. Liu, Y. Chong, Z. Gu, C.A. Jimenez-Cruz, Z. Chai and R. Zhou, *Nanoscale*, 2015, **7**, 18725-18737.
2. Y. Deng, F. Wang, Y. Liu, Y. Yang, Y. Qu, M. Zhao, Y. Mu and W. Li, *Nanoscale*, 2020, **12**, 5217-5226.
3. Z. Gu, L. Zhao, S. Liu, G. Duan, J.M. Perez-Aguilar, J. Luo, W. Li and R. Zhou, *ACS Nano*, 2017, **11**, 3198-3206.
4. Y. Wu, L.K. Wagner and N.R. Aluru, *J. Chem. Phys.*, 2016, **144**, 164118.
